# Supplementary material for: Small molecule-based supramolecular-polymer double-network hydrogel electrolytes for ultra-stretchable and waterproof Zn–air batteries working from −50 to 100 °C
Source: Royal Society of Chemistry journal article supplement (doi:10.1039/d1ee01134k), 2021-01-01
Supplement: d1ee01134k2.xlsx [file d1ee01134k2.xlsx]

## Sheet: Sheet1
Table S12. Cartesian coordinates (Angstroms) of the optimized (G-CyBA)16/PAAm SP-DN hydrogels.
Atom	X	Y	Z	Atom	X	Y	Z
C(1)	-8.9623	-3.8728	4.7898	C(439)	7.2128	3.2787	1.8782
O(2)	-8.8092	-4.4317	3.5193	C(440)	6.842	2.1506	2.8876
C(3)	-8.1863	-5.7133	3.5602	H(441)	7.3554	0.0466	2.2575
C(4)	-8.2824	-6.2326	5.0185	H(442)	7.7555	2.7704	-0.288
C(5)	-8.7194	-4.9884	5.8574	H(443)	6.6159	4.2059	2.0007
H(6)	-10.0027	-3.4521	4.8055	H(444)	5.9606	2.3953	3.5025
H(7)	-8.6834	-6.3066	2.7724	O(445)	8.531	3.6256	2.1049
H(8)	-7.3304	-6.6801	5.3587	O(446)	7.9101	1.9481	3.73
H(9)	-7.9892	-4.6913	6.6281	O(447)	5.796	3.0695	-0.0705
O(10)	-9.2564	-7.1991	5.1527	H(448)	5.0382	3.0805	0.5998
O(11)	-9.8967	-5.2892	6.4988	C(449)	3.0284	0.1077	2.2221
O(12)	-6.8607	-5.5734	3.1573	C(450)	4.0819	1.0615	2.0461
H(13)	-6.3057	-5.104	3.851	C(451)	2.6086	2.8204	1.9189
C(14)	-6.1719	-1.4793	5.222	C(452)	1.6777	0.5553	2.2279
C(15)	-6.6285	-2.8303	5.1217	C(453)	4.9051	-1.0109	2.2835
C(16)	-4.5028	-3.6652	5.4096	H(454)	5.6417	-1.8024	2.337
C(17)	-4.7983	-1.2156	5.4885	N(455)	3.5862	-1.1603	2.3671
C(18)	-8.3225	-1.3871	4.8594	N(456)	3.9078	2.3952	1.8787
H(19)	-9.3379	-1.05	4.6597	N(457)	2.3666	4.1357	1.8489
N(20)	-7.2515	-0.6161	5.0425	H(458)	1.4021	4.5265	1.7804
N(21)	-5.8214	-3.9284	5.1933	H(459)	3.1509	4.812	1.8635
N(22)	-3.6455	-4.7094	5.4978	N(460)	1.5148	1.9494	2.0649
H(23)	-2.6154	-4.5834	5.6038	H(461)	0.5409	2.3388	2.028
H(24)	-3.9655	-5.6283	5.238	O(462)	0.6542	-0.1082	2.3635
N(25)	-3.99	-2.3788	5.6002	N(463)	5.2697	0.352	2.1097
H(26)	-2.9809	-2.2515	5.8384	B(464)	9.1183	2.5459	3.0287
O(27)	-4.2351	-0.1445	5.6447	C(465)	11.5706	3.2523	3.6611
N(28)	-7.9972	-2.7666	4.9325	C(466)	10.1444	3.0848	4.1859
B(29)	-10.4605	-6.534	5.8082	C(467)	9.6288	4.4016	4.7552
C(30)	-11.7087	-8.7533	6.2434	C(468)	10.5501	4.8868	5.8909
C(31)	-11.1655	-7.5061	6.9375	C(469)	11.9889	5.0529	5.3772
C(32)	-10.1366	-7.8821	8.003	C(470)	12.5049	3.7286	4.7924
C(33)	-10.7452	-8.8542	9.0356	H(471)	8.5942	4.2868	5.1338
C(34)	-11.2731	-10.1125	8.3264	H(472)	10.1236	2.291	4.963
C(35)	-12.3224	-9.7301	7.2694	H(473)	11.5902	3.9836	2.8302
H(36)	-9.7664	-6.9703	8.5056	H(474)	11.9446	2.299	3.2444
H(37)	-11.9882	-6.9123	7.3785	H(475)	10.5255	4.1632	6.7213
H(38)	-10.8947	-9.2513	5.6814	H(476)	10.1639	5.8378	6.2985
H(39)	-12.4642	-8.4612	5.4895	H(477)	12.6506	5.4034	6.1821
H(40)	-11.566	-8.3528	9.5729	H(478)	12.0151	5.8247	4.5822
H(41)	-9.9926	-9.13	9.7894	H(479)	12.5541	2.9594	5.5795
H(42)	-11.6966	-10.8183	9.0552	H(480)	13.5285	3.8544	4.4072
H(43)	-10.4297	-10.6294	7.8299	H(481)	9.5669	5.1685	3.9576
H(44)	-13.1897	-9.2541	7.7544	O(482)	9.8578	1.595	2.1419
H(45)	-12.6961	-10.6314	6.7611	H(483)	9.2483	1.1565	1.5486
H(46)	-9.2544	-8.3449	7.5184	C(484)	-4.1354	-7.7937	-1.9545
O(47)	-11.4956	-6.1899	4.812	O(485)	-3.5663	-8.0385	-3.2188
H(48)	-11.1186	-5.6367	4.1252	C(486)	-2.3287	-8.7549	-3.1236
C(49)	2.4518	-6.5639	5.8757	C(487)	-2.2154	-9.3344	-1.6978
O(50)	2.9923	-6.5863	4.5879	C(488)	-3.3546	-8.6355	-0.8903
C(51)	4.2866	-5.996	4.5282	H(489)	-5.2088	-8.099	-2.0514
C(52)	4.8183	-5.8718	5.9774	H(490)	-2.3497	-9.474	-3.9588
C(53)	3.5806	-6.172	6.8844	H(491)	-1.2098	-9.186	-1.2556
H(54)	2.0312	-7.5921	6.0406	H(492)	-2.9846	-8.0274	-0.0452
H(55)	4.8617	-6.6273	3.8216	O(493)	-2.471	-10.6881	-1.7197
H(56)	5.271	-4.8815	6.1675	O(494)	-4.1815	-9.6099	-0.3896
H(57)	3.2937	-5.3332	7.5392	O(495)	-1.3251	-7.8417	-3.4254
O(58)	5.7839	-6.8174	6.2468	H(496)	-1.1651	-7.1933	-2.6642
O(59)	3.8865	-7.2406	7.6903	C(497)	-3.399	-4.2058	-1.4916
O(60)	4.181	-4.7435	3.927	C(498)	-2.9438	-5.5635	-1.5233
H(61)	3.7011	-4.0869	4.5182	C(499)	-0.7583	-4.9427	-1.1717
C(62)	0.061	-3.737	5.906	C(500)	-2.4512	-3.156	-1.3685
C(63)	1.4106	-4.2062	5.85	C(501)	-5.1687	-5.4505	-1.7837
C(64)	2.2446	-2.0635	5.7678	H(502)	-6.1816	-5.7997	-1.9312
C(65)	-0.2017	-2.3388	5.9515	N(503)	-4.7848	-4.186	-1.6427
C(66)	-0.0339	-5.9176	5.911	N(504)	-1.6511	-5.9528	-1.3847
H(67)	-0.3719	-6.9527	5.8941	N(505)	0.5188	-5.2659	-0.909
N(68)	-0.8036	-4.8302	5.9294	H(506)	1.2566	-4.55	-0.7768
N(69)	2.5079	-3.3979	5.7577	H(507)	0.7649	-6.2559	-0.7058
N(70)	3.2894	-1.2023	5.6892	N(508)	-1.1104	-3.5802	-1.2131
H(71)	3.1617	-0.1739	5.6338	H(509)	-0.3588	-2.8534	-1.1602
H(72)	4.1979	-1.5595	5.4445	O(510)	-2.6558	-1.945	-1.3972
N(73)	0.963	-1.5236	5.9088	N(511)	-4.069	-6.3505	-1.7009
H(74)	0.8413	-0.4898	5.9923	B(512)	-3.8959	-10.8738	-1.2025
O(75)	-1.2705	-1.756	6.0322	C(513)	-3.7355	-13.4464	-1.0338
N(76)	1.3462	-5.5863	5.8946	C(514)	-4.0044	-12.1812	-0.2145
B(77)	5.112	-7.9154	7.0625	C(515)	-2.985	-12.0336	0.9113
C(78)	6.5838	-7.2977	9.107	C(516)	-2.9682	-13.2792	1.8155
C(79)	6.136	-8.4666	8.2301	C(517)	-2.6884	-14.5416	0.9833
C(80)	5.4081	-9.5222	9.0606	C(518)	-3.7392	-14.6965	-0.1285
C(81)	6.2935	-10.0186	10.2236	H(519)	-3.2084	-11.1321	1.5171
C(82)	6.7203	-8.8341	11.1066	H(520)	-5.0369	-12.1888	0.1833
C(83)	7.4746	-7.7892	10.2671	H(521)	-2.7598	-13.3534	-1.5461
H(84)	5.1179	-10.3705	8.4104	H(522)	-4.4935	-13.546	-1.8302
H(85)	6.9984	-8.9103	7.6977	H(523)	-3.929	-13.3748	2.343
H(86)	5.6967	-6.7707	9.5067	H(524)	-2.1868	-13.149	2.5914
H(87)	7.1281	-6.5572	8.4912	H(525)	-2.6727	-15.4336	1.6258
H(88)	7.1849	-10.5218	9.8145	H(526)	-1.6829	-14.4554	0.5302
H(89)	5.7524	-10.7653	10.8232	H(527)	-4.74	-14.8208	0.3162
H(90)	7.3429	-9.1797	11.9443	H(528)	-3.541	-15.6	-0.7222
H(91)	5.8211	-8.3661	11.5476	H(529)	-1.9718	-11.8649	0.4918
H(92)	8.3973	-8.2318	9.857	O(530)	-4.8537	-11.0323	-2.3266
H(93)	7.781	-6.9422	10.8987	H(531)	-4.7881	-10.2851	-2.9155
H(94)	4.4628	-9.1026	9.4542	C(532)	6.2642	-2.8952	-1.2361
O(95)	4.7261	-9.0632	6.2196	O(533)	6.424	-2.6942	-2.624
H(96)	4.1619	-8.7698	5.5018	C(534)	7.1506	-1.5104	-2.9324
C(97)	-6.2343	7.5599	4.336	C(535)	7.799	-0.9903	-1.63
O(98)	-6.5608	7.4378	2.9835	C(536)	7.2032	-1.8896	-0.5037
C(99)	-7.8144	6.7914	2.7805	H(537)	6.5467	-3.9729	-1.0682
C(100)	-8.5775	6.8172	4.1311	H(538)	7.8354	-1.8089	-3.7508
C(101)	-7.5113	7.2588	5.1848	H(539)	7.6381	0.0918	-1.4623
H(102)	-5.847	8.6064	4.4539	H(540)	6.6896	-1.3183	0.2889
H(103)	-8.277	7.3113	1.9232	O(541)	9.1642	-1.2201	-1.6799
H(104)	-9.042	5.84	4.3587	O(542)	8.2401	-2.5906	0.0807
H(105)	-7.3319	6.5128	5.9766	O(543)	6.2897	-0.5872	-3.5027
O(106)	-9.5873	7.7558	4.1282	H(544)	5.6134	-0.2292	-2.8328
O(107)	-7.9527	8.4088	5.7943	C(545)	2.7186	-2.0054	-1.0121
O(108)	-7.5775	5.4864	2.3551	C(546)	4.0803	-1.5964	-1.1543
H(109)	-7.2188	4.9119	3.0969	C(547)	3.4937	0.6069	-1.4066
C(110)	-3.8823	4.7886	5.0336	C(548)	1.6836	-1.0546	-1.2091
C(111)	-5.2105	5.2337	4.7491	C(549)	3.9374	-3.7673	-0.5918
C(112)	-6.0399	3.0879	4.8061	H(550)	4.2767	-4.7607	-0.3003
C(113)	-3.636	3.4063	5.2686	N(551)	2.6791	-3.3544	-0.6606
C(114)	-3.7784	6.956	4.7946	N(552)	4.4924	-0.3289	-1.4012
H(115)	-3.4356	7.9844	4.6988	N(553)	3.8457	1.9003	-1.4403
N(116)	-3.023	5.8865	5.0411	H(554)	3.1339	2.6633	-1.4162
N(117)	-6.2918	4.4129	4.6141	H(555)	4.8378	2.1654	-1.3024
N(118)	-7.0663	2.2164	4.6783	N(556)	2.1279	0.278	-1.3805
H(119)	-6.9484	1.1835	4.7754	H(557)	1.4111	1.0389	-1.5009
H(120)	-7.9461	2.5427	4.3143	O(558)	0.4743	-1.2605	-1.2543
N(121)	-4.7889	2.5818	5.1703	N(559)	4.8567	-2.7171	-0.9021
H(122)	-4.6849	1.5656	5.386	B(560)	9.3994	-2.4976	-0.8781
O(123)	-2.5878	2.8481	5.5497	C(561)	10.7197	-1.3311	0.9705
N(124)	-5.1464	6.6107	4.6387	C(562)	10.8284	-2.4255	-0.0909
B(125)	-9.0889	8.9543	4.9257	C(563)	11.1388	-3.7762	0.5529
C(126)	-11.4003	10.1049	5.028	C(564)	12.4353	-3.6902	1.3801
C(127)	-10.2629	9.5787	5.9009	C(565)	12.3264	-2.5842	2.4425
C(128)	-10.7664	8.4952	6.8536	C(566)	12.0182	-1.2299	1.7856
C(129)	-11.9198	9.0268	7.7303	H(567)	11.2399	-4.5668	-0.2146
C(130)	-13.0647	9.5381	6.8401	H(568)	11.6089	-2.176	-0.8366
C(131)	-12.5575	10.642	5.8974	H(569)	9.8718	-1.54	1.6563
H(132)	-9.9352	8.1374	7.4878	H(570)	10.479	-0.3506	0.5172
H(133)	-9.7848	10.4034	6.462	H(571)	13.2875	-3.4859	0.7108
H(134)	-11.7645	9.2967	4.3641	H(572)	12.6398	-4.6608	1.8589
H(135)	-11.0199	10.8998	4.359	H(573)	13.2532	-2.5255	3.0317
H(136)	-11.5484	9.8423	8.3711	H(574)	11.5159	-2.8363	3.1527
H(137)	-12.2845	8.235	8.4016	H(575)	12.8538	-0.917	1.1398
H(138)	-13.898	9.9067	7.4553	H(576)	11.9035	-0.4407	2.5536
H(139)	-13.4573	8.6976	6.2363	H(577)	10.2941	-4.0872	1.2003
H(140)	-12.2045	11.5054	6.4838	O(578)	9.4031	-3.6575	-1.8474
H(141)	-13.3775	11.0036	5.2593	H(579)	8.5511	-3.7127	-2.2785
H(142)	-11.1059	7.6174	6.269	C(580)	-8.9551	2.6187	-3.4084
O(143)	-8.6309	10.041	4.0357	O(581)	-8.9782	1.999	-4.6718
H(144)	-7.9478	9.7155	3.4459	C(582)	-9.7096	0.766	-4.6576
C(145)	5.1918	4.8869	5.047	C(583)	-10.5093	0.6936	-3.3405
O(146)	5.1763	5.1563	3.6728	C(584)	-9.9602	1.8682	-2.4712
C(147)	4.6264	6.4352	3.3686	H(585)	-9.2439	3.6837	-3.5971
C(148)	4.649	7.266	4.6718	H(586)	-10.2887	0.7668	-5.5962
C(149)	4.8522	6.2104	5.8094	H(587)	-10.4265	-0.2946	-2.8448
H(150)	6.2238	4.5026	5.2668	H(588)	-9.4996	1.5352	-1.5236
H(151)	5.2162	6.8049	2.5046	O(589)	-11.8444	0.9299	-3.589
H(152)	3.7383	7.8791	4.796	O(590)	-11.0077	2.7027	-2.1691
H(153)	3.9939	6.1071	6.4909	O(591)	-8.7678	-0.2477	-4.7887
O(154)	5.7296	8.1289	4.6956	H(592)	-8.2493	-0.3949	-3.9301
O(155)	5.9364	6.6063	6.5601	C(593)	-5.5006	1.9331	-2.3025
O(156)	3.3264	6.276	2.9097	C(594)	-6.8273	1.4629	-2.57
H(157)	2.7061	5.9316	3.6245	C(595)	-6.267	-0.7133	-2.0862
C(158)	2.376	2.5519	5.5519	C(596)	-4.4857	0.9933	-1.979
C(159)	2.8396	3.8767	5.2817	C(597)	-6.684	3.6839	-2.8461
C(160)	0.6975	4.6992	5.1411	H(598)	-7.0089	4.6888	-3.0733
C(161)	0.978	2.2992	5.6593	N(599)	-5.4619	3.3172	-2.4714
C(162)	4.5541	2.4529	5.532	N(600)	-7.2287	0.1696	-2.4862
H(163)	5.5843	2.1155	5.5612	N(601)	-6.6229	-1.9857	-1.8495
N(164)	3.4686	1.6985	5.6884	H(602)	-5.9242	-2.7416	-1.6979
N(165)	2.0351	4.9528	5.05	H(603)	-7.6292	-2.2409	-1.8116
N(166)	-0.1616	5.7297	4.9655	N(604)	-4.9212	-0.3485	-1.8882
H(167)	-1.1989	5.6024	4.9614	H(605)	-4.2104	-1.095	-1.701
H(168)	0.1866	6.5966	4.5876	O(606)	-3.2915	1.2108	-1.7862
N(169)	0.1647	3.449	5.4684	N(607)	-7.5768	2.5771	-2.9071
H(170)	-0.8695	3.3392	5.5766	B(608)	-12.1245	2.3671	-3.1584
O(171)	0.4041	1.251	5.9012	C(609)	-14.6891	2.1698	-3.3939
N(172)	4.2217	3.8167	5.3098	C(610)	-13.5736	2.4823	-2.3929
B(173)	6.7448	7.5088	5.6374	C(611)	-13.5953	1.4972	-1.2272
C(174)	6.5622	9.5992	7.1485	C(612)	-14.9687	1.4884	-0.5319
C(175)	7.5616	8.6579	6.4769	C(613)	-16.079	1.1636	-1.5448
C(176)	8.4434	7.9715	7.5193	C(614)	-16.0676	2.1789	-2.6994
C(177)	9.1904	9.0187	8.3686	H(615)	-12.8029	1.7524	-0.4952
C(178)	8.1828	9.9561	9.0554	H(616)	-13.6561	3.5252	-2.0327
C(179)	7.2976	10.649	8.0055	H(617)	-14.5044	1.1817	-3.855
H(180)	9.1631	7.2943	7.0194	H(618)	-14.6695	2.903	-4.2189
H(181)	8.182	9.2145	5.746	H(619)	-15.1573	2.4637	-0.0586
H(182)	5.8615	9.0175	7.7758	H(620)	-14.9585	0.7343	0.2808
H(183)	5.94	10.0978	6.3806	H(621)	-17.0616	1.1517	-1.0517
H(184)	9.8644	9.6037	7.7189	H(622)	-15.91	0.1468	-1.9467
H(185)	9.8228	8.5231	9.1199	H(623)	-16.2733	3.19	-2.3119
H(186)	8.7062	10.702	9.671	H(624)	-16.8624	1.9483	-3.4227
H(187)	7.5452	9.3694	9.7409	H(625)	-13.3521	0.4754	-1.5849
H(188)	7.9201	11.283	7.3509	O(626)	-12.1174	3.2862	-4.3258
H(189)	6.5737	11.3151	8.498	H(627)	-11.2833	3.2216	-4.7836
H(190)	7.825	7.325	8.17	C(628)	1.64	7.5577	-1.8271
O(191)	7.7384	6.718	4.8549	O(629)	1.5746	7.6079	-3.2298
H(192)	7.3087	6.1432	4.2231	C(630)	0.4588	8.3624	-3.6897
K(193)	-1.785	0.4057	4.012	C(631)	-0.0605	9.2097	-2.5037
K(194)	-1.2368	-0.2536	-3.5671	C(632)	0.6209	8.5829	-1.2457
C(195)	-7.697	-5.4517	-5.8848	H(633)	2.71	7.7999	-1.5658
O(196)	-7.4855	-5.6002	-7.2689	H(634)	0.8219	8.9004	-4.5793
C(197)	-6.6113	-6.6923	-7.5588	H(635)	-1.1659	9.2191	-2.4418
C(198)	-6.5936	-7.6213	-6.3175	H(636)	-0.0949	8.1221	-0.5462
C(199)	-7.3164	-6.8092	-5.1995	O(637)	0.3678	10.514	-2.6198
H(200)	-8.7791	-5.2046	-5.7753	O(638)	1.2945	9.5789	-0.5832
H(201)	-6.9973	-7.1175	-8.4972	O(639)	-0.5101	7.4712	-4.1557
H(202)	-5.5669	-7.9374	-6.044	H(640)	-0.989	7.0076	-3.3954
H(203)	-6.716	-6.6665	-4.2814	C(641)	0.5898	4.0488	-1.5108
O(204)	-7.3248	-8.7577	-6.5823	C(642)	0.2182	5.4212	-1.6789
O(205)	-8.4683	-7.4784	-4.8609	C(643)	-1.9938	4.8672	-1.9918
O(206)	-5.3449	-6.2051	-7.8637	C(644)	-0.379	3.0318	-1.6947
H(207)	-4.8623	-5.9065	-7.04	C(645)	2.3837	5.2317	-1.1238
C(208)	-5.1832	-2.8539	-5.2282	H(646)	3.3916	5.5495	-0.8588
C(209)	-5.5188	-4.2395	-5.297	N(647)	1.939	3.9806	-1.1661
C(210)	-3.3397	-4.8819	-4.9382	N(648)	-1.0408	5.8454	-1.9574
C(211)	-3.8212	-2.4615	-5.1064	N(649)	-3.2847	5.2324	-2.0787
C(212)	-7.348	-2.9465	-5.4728	H(650)	-4.0478	4.5393	-2.2156
H(213)	-8.3925	-2.687	-5.5606	H(651)	-3.539	6.235	-1.977
N(214)	-6.3432	-2.0901	-5.3357	N(652)	-1.6939	3.4935	-1.9176
N(215)	-4.6294	-5.2628	-5.1935	H(653)	-2.4613	2.7851	-2.0316
N(216)	-2.4347	-5.8296	-4.6447	O(654)	-0.1948	1.8142	-1.6778
H(217)	-1.4247	-5.6366	-4.5194	N(655)	1.3603	6.1702	-1.433
H(218)	-2.7393	-6.7869	-4.3596	B(656)	1.4977	10.6989	-1.6061
N(219)	-2.9102	-3.5429	-4.9847	C(657)	1.5623	13.2652	-1.873
H(220)	-1.8886	-3.3289	-4.9657	C(658)	1.3962	12.1485	-0.8385
O(221)	-3.3619	-1.3294	-5.1038	C(659)	0.0464	12.2507	-0.1361
N(222)	-6.9002	-4.304	-5.4383	C(660)	-0.141	13.6351	0.5114
B(223)	-8.6695	-8.5919	-5.8851	C(661)	0.0147	14.7464	-0.54
C(224)	-9.201	-11.1155	-6.1063	C(662)	1.392	14.6522	-1.2171
C(225)	-9.0574	-9.9782	-5.0899	H(663)	-0.0456	11.461	0.6378
C(226)	-7.9404	-10.2723	-4.0901	H(664)	2.2264	12.1728	-0.1064
C(227)	-8.1424	-11.6261	-3.3901	H(665)	0.8185	13.1354	-2.6804
C(228)	-8.284	-12.7536	-4.4256	H(666)	2.5542	13.186	-2.352
C(229)	-9.4451	-12.4603	-5.3905	H(667)	0.5915	13.7718	1.3215
H(230)	-7.8838	-9.4622	-3.3345	H(668)	-1.1444	13.6828	0.9784
H(231)	-10.0179	-9.7948	-4.5748	H(669)	-0.1229	15.7361	-0.0815
H(232)	-8.2823	-11.177	-6.7198	H(670)	-0.7785	14.6336	-1.3018
H(233)	-10.0238	-10.895	-6.8048	H(671)	2.1882	14.8001	-0.4689
H(234)	-9.0288	-11.591	-2.7399	H(672)	1.5078	15.4478	-1.9663
H(235)	-7.2645	-11.8207	-2.7339	H(673)	-0.7751	12.0596	-0.8555
H(236)	-8.4351	-13.7212	-3.9251	O(674)	2.8241	10.6151	-2.2613
H(237)	-7.3398	-12.8335	-4.9968	H(675)	2.9196	9.7849	-2.722
H(238)	-10.3934	-12.4092	-4.8312	C(676)	3.8704	-6.8047	-3.6459
H(239)	-9.5525	-13.2712	-6.1244	O(677)	4.5814	-7.1878	-4.7982
H(240)	-6.9552	-10.2682	-4.602	C(678)	5.8045	-6.4623	-4.9381
O(241)	-9.7283	-8.2273	-6.8766	C(679)	6.1734	-5.8934	-3.5447
H(242)	-9.4776	-7.3964	-7.2699	C(680)	4.8408	-5.9699	-2.7455
C(243)	-6.0888	6.0195	-6.9852	H(681)	3.5413	-7.7596	-3.1647
O(244)	-5.9855	5.7677	-8.3659	H(682)	6.5033	-7.1747	-5.4017
C(245)	-6.9992	4.8661	-8.8181	H(683)	6.5954	-4.8728	-3.6205
C(246)	-8.1372	4.8768	-7.765	H(684)	4.4262	-4.9738	-2.5035
C(247)	-7.5403	5.6308	-6.5377	O(685)	7.1	-6.6855	-2.9008
H(248)	-5.8834	7.1093	-6.8679	O(686)	5.0769	-6.638	-1.5731
H(249)	-7.2504	5.2164	-9.8302	O(687)	5.6354	-5.4339	-5.8538
H(250)	-8.4985	3.856	-7.5268	H(688)	4.9958	-4.7321	-5.5096
H(251)	-7.5533	5.0488	-5.5968	C(689)	1.2528	-4.3821	-4.5603
O(252)	-9.2067	5.5975	-8.2489	C(690)	2.6335	-4.6991	-4.3919
O(253)	-8.2694	6.7798	-6.3445	C(691)	3.2847	-2.522	-4.7141
O(254)	-6.4532	3.5998	-8.9847	C(692)	0.8685	-3.0408	-4.8477
H(255)	-6.3041	3.1469	-8.102	C(693)	1.3391	-6.4985	-4.0322
C(256)	-3.6014	3.5963	-5.7768	H(694)	1.0834	-7.5203	-3.7883
C(257)	-4.956	3.8863	-6.1256	N(695)	0.488	-5.5253	-4.3407
C(258)	-5.6077	1.7024	-5.8168	N(696)	3.6643	-3.8182	-4.5157
C(259)	-3.2128	2.2471	-5.5368	N(697)	4.2395	-1.5737	-4.7381
C(260)	-3.703	5.7488	-6.0947	H(698)	4.0164	-0.5591	-4.839
H(261)	-3.4668	6.7962	-6.1621	H(699)	5.186	-1.7777	-4.3775
N(262)	-2.8611	4.7763	-5.763	N(700)	1.9535	-2.1244	-4.9159
N(263)	-5.9574	2.9722	-6.1978	H(701)	1.7361	-1.123	-5.1478
N(264)	-6.5738	0.7856	-5.6685	O(702)	-0.2513	-2.5897	-5.0223
H(265)	-6.3883	-0.2207	-5.4733	N(703)	2.689	-6.0386	-4.0423
H(266)	-7.5743	1.0737	-5.5766	B(704)	6.3548	-7.4293	-1.7686
N(267)	-4.2755	1.3104	-5.5893	C(705)	7.3561	-6.0056	0.1536
H(268)	-4.0509	0.2963	-5.456	C(706)	7.1663	-7.4386	-0.3446
O(269)	-2.0914	1.8195	-5.3091	C(707)	6.3384	-8.234	0.6683
N(270)	-5.0273	5.2613	-6.3152	C(708)	7.0105	-8.2236	2.0531
B(271)	-9.1717	6.9573	-7.5625	C(709)	7.2476	-6.7839	2.5332
C(272)	-11.6121	7.4737	-8.2554	C(710)	8.0777	-5.9978	1.5109
C(273)	-10.6792	7.3611	-7.0452	H(711)	6.1948	-9.2715	0.3203
C(274)	-11.1524	6.2695	-6.087	H(712)	8.1435	-7.9244	-0.5218
C(275)	-12.6103	6.4869	-5.6501	H(713)	6.3678	-5.5154	0.2705
C(276)	-13.5306	6.5968	-6.8767	H(714)	7.9244	-5.3977	-0.5741
C(277)	-13.0645	7.7323	-7.8033	H(715)	7.9667	-8.7682	2.0099
H(278)	-10.4938	6.2334	-5.1948	H(716)	6.378	-8.7615	2.7829
H(279)	-10.5921	8.3354	-6.5309	H(717)	7.7386	-6.787	3.52
H(280)	-11.5621	6.5386	-8.8447	H(718)	6.2717	-6.2734	2.6783
H(281)	-11.2668	8.2782	-8.9239	H(719)	9.0841	-6.4329	1.4097
H(282)	-12.6916	7.3912	-5.0292	H(720)	8.221	-4.9535	1.8474
H(283)	-12.9214	5.6275	-5.0149	H(721)	5.3166	-7.8044	0.7418
H(284)	-14.5728	6.7587	-6.5649	O(722)	6.1347	-8.8229	-2.2394
H(285)	-13.507	5.6375	-7.4273	H(723)	5.6413	-8.8027	-3.0528
H(286)	-13.1148	8.6956	-7.2703	C(724)	5.3469	4.6003	-4.2407
H(287)	-13.7279	7.817	-8.6754	O(725)	5.7459	5.1451	-5.4723
H(288)	-11.0569	5.2713	-6.5635	C(726)	5.1041	6.4005	-5.717
O(289)	-8.6242	7.9941	-8.4924	C(727)	4.6769	6.9676	-4.3406
H(290)	-7.7423	7.7238	-8.7314	C(728)	4.5951	5.7079	-3.4283
K(291)	-1.537	0.1384	0.2269	H(729)	6.2867	4.2579	-3.7388
C(292)	-9.7677	-0.3959	0.8859	H(730)	5.8287	6.9775	-6.3069
O(293)	-9.8346	-0.9501	-0.3976	H(731)	3.7307	7.5408	-4.4058
C(294)	-10.002	-2.3656	-0.3583	H(732)	3.5597	5.4235	-3.1681
C(295)	-10.5152	-2.7315	1.0563	O(733)	5.6451	7.8023	-3.829
C(296)	-10.1056	-1.5101	1.9315	O(734)	5.2804	5.9727	-2.2754
H(297)	-10.4933	0.4555	0.8909	O(735)	4.004	6.1968	-6.5433
H(298)	-10.6419	-2.606	-1.2221	H(736)	3.2707	5.7023	-6.0653
H(299)	-10.0937	-3.6919	1.4164	C(737)	2.8113	2.0178	-4.9593
H(300)	-9.2652	-1.734	2.6104	C(738)	3.1529	3.399	-4.8268
O(301)	-11.8893	-2.8325	1.0876	C(739)	0.9759	4.0728	-5.1208
O(302)	-11.18	-1.1338	2.6921	C(740)	1.4592	1.6444	-5.206
O(303)	-8.7684	-2.9669	-0.6064	C(741)	4.9466	2.0871	-4.5108
H(304)	-8.1268	-2.8354	0.1621	H(742)	5.9714	1.8169	-4.3052
C(305)	-6.2012	0.3802	1.4784	N(743)	3.9505	1.2434	-4.7692
C(306)	-7.2475	-0.5851	1.3194	N(744)	2.2823	4.436	-4.958
C(307)	-5.8219	-2.3495	1.6936	N(745)	0.0347	5.0345	-5.1173
C(308)	-4.8848	-0.0652	1.77	H(746)	-0.9658	4.8417	-5.2931
C(309)	-8.0314	1.4955	1.0503	H(747)	0.2833	6.0138	-4.8617
H(310)	-8.7431	2.2824	0.8356	N(748)	0.5604	2.739	-5.2907
N(311)	-6.7341	1.6555	1.3041	H(749)	-0.451	2.5306	-5.4662
N(312)	-7.0865	-1.9305	1.4089	O(750)	1.0016	0.5188	-5.3372
N(313)	-5.6018	-3.6647	1.8536	N(751)	4.5025	3.4347	-4.5156
H(314)	-4.6455	-4.0613	1.9597	B(752)	6.2611	7.0919	-2.6185
H(315)	-6.4001	-4.3262	1.8988	C(753)	6.3674	9.5309	-1.7934
N(316)	-4.7348	-1.4675	1.8572	C(754)	6.4095	8.0793	-1.3126
H(317)	-3.779	-1.8601	2.0322	C(755)	5.2703	7.8046	-0.3268
O(318)	-3.8825	0.6214	1.9642	C(756)	5.2843	8.7953	0.8501
N(319)	-8.4071	0.1296	1.0816	C(757)	5.2603	10.2398	0.3361
B(320)	-12.417	-1.7267	2.0022	C(758)	6.4498	10.5001	-0.5993
C(321)	-14.4301	-3.2645	2.5025	H(759)	5.3337	6.7671	0.0526
C(322)	-13.4323	-2.3117	3.1637	H(760)	7.3914	7.8552	-0.8488
C(323)	-12.6078	-3.0355	4.2258	H(761)	5.4185	9.7229	-2.3437
C(324)	-13.4986	-3.7306	5.2721	H(762)	7.1796	9.7243	-2.5108
C(325)	-14.4883	-4.6806	4.5813	H(763)	6.1733	8.628	1.4812
C(326)	-15.3452	-3.9225	3.5563	H(764)	4.3984	8.6223	1.4925
H(327)	-11.9309	-2.3246	4.7337	H(765)	5.2526	10.9535	1.1712
H(328)	-13.956	-1.4403	3.5972	H(766)	4.3102	10.4082	-0.2293
H(329)	-13.8812	-4.0516	1.9469	H(767)	7.4051	10.3644	-0.0678
H(330)	-15.0291	-2.7188	1.754	H(768)	6.4302	11.5404	-0.9578
H(331)	-14.035	-2.9862	5.8757	H(769)	4.2978	7.8947	-0.8574
H(332)	-12.8514	-4.3168	5.958	O(770)	7.58	6.512	-3.0128
H(333)	-15.1223	-5.1863	5.3228	H(771)	7.5158	6.1917	-3.9058
H(334)	-13.901	-5.4762	4.0719	C(772)	9.7027	6.1357	-0.5121
H(335)	-15.9435	-3.1484	4.0613	C(773)	10.3491	7.0058	0.5801
H(336)	-16.0565	-4.6057	3.0701	H(774)	8.8602	5.5514	-0.0828
H(337)	-11.9617	-3.7944	3.7331	H(775)	9.2197	6.7972	-1.2806
O(338)	-13.1475	-0.7087	1.2152	C(776)	9.224	7.7419	1.329
H(339)	-12.6712	-0.5054	0.4112	H(777)	8.4515	8.0805	0.5882
C(340)	-0.9934	-7.9737	2.3332	H(778)	8.694	7.0119	1.9839
O(341)	-0.5047	-8.2596	1.0521	C(779)	10.7016	5.2217	-1.2233
C(342)	0.9123	-8.4242	1.0481	H(780)	11.5079	5.863	-1.6626
C(343)	1.34	-8.7274	2.504	C(781)	9.9958	4.4575	-2.364
C(344)	0.1807	-8.1296	3.3588	H(782)	9.7167	5.1761	-3.1654
H(345)	-1.8371	-8.6877	2.5107	H(783)	9.0208	4.0612	-2.0062
H(346)	1.115	-9.1805	0.2735	C(784)	10.8615	3.3168	-2.9244
H(347)	2.334	-8.2999	2.7472	H(785)	11.302	2.7383	-2.0625
H(348)	0.4559	-7.1831	3.8521	C(786)	10.0331	2.3229	-3.7523
O(349)	1.3891	-10.0835	2.7513	H(787)	9.1861	1.9501	-3.1376
O(350)	-0.1505	-9.0397	4.3274	H(788)	9.5878	2.8429	-4.6253
O(351)	1.5012	-7.2411	0.6048	C(789)	10.8947	1.1489	-4.25
H(352)	1.4233	-6.5041	1.2885	H(790)	11.527	1.5397	-5.0923
C(353)	-1.779	-4.3604	2.2736	C(791)	10.0353	-0.0179	-4.7634
C(354)	-0.8141	-5.4189	2.3036	H(792)	9.2682	-0.2809	-3.9958
C(355)	0.9542	-3.9539	2.3699	H(793)	9.4692	0.2955	-5.6612
C(356)	-1.3304	-3.0134	2.3001	C(794)	10.885	-1.2637	-5.0755
C(357)	-2.8953	-6.2389	2.2226	H(795)	11.5657	-1.47	-4.202
H(358)	-3.6835	-6.9789	2.1581	C(796)	10.0008	-2.5032	-5.2598
N(359)	-3.056	-4.9165	2.2236	H(797)	9.3767	-2.6351	-4.3417
N(360)	0.5323	-5.248	2.3337	H(798)	9.2993	-2.3471	-6.1046
N(361)	2.2724	-3.7157	2.4674	C(799)	10.8251	-3.7752	-5.519
H(362)	2.6739	-2.7637	2.3855	H(800)	11.2448	-3.7057	-6.5562
H(363)	2.9297	-4.5031	2.6319	C(801)	9.9272	-5.0202	-5.409
N(364)	0.0742	-2.8554	2.3404	H(802)	9.3151	-4.9481	-4.4754
H(365)	0.4684	-1.8879	2.331	H(803)	9.196	-5.0327	-6.2419
O(366)	-2.0077	-1.9873	2.305	C(804)	10.7143	-6.344	-5.3755
N(367)	-1.5278	-6.6022	2.3101	H(805)	11.5767	-6.2387	-4.6564
B(368)	0.2904	-10.3999	3.7643	C(806)	9.8226	-7.4922	-4.8692
C(369)	2.0827	-10.6842	5.6089	H(807)	8.7867	-7.1316	-4.6618
C(370)	0.8627	-11.348	4.9798	H(808)	9.6883	-8.2663	-5.6465
C(371)	-0.2451	-11.5505	6.0159	C(809)	10.419	-8.1264	-3.5999
C(372)	0.2679	-12.3824	7.211	H(810)	11.3984	-8.5915	-3.8691
C(373)	1.4836	-11.689	7.8477	C(811)	9.485	-9.2096	-3.0537
C(374)	2.6007	-11.4982	6.8093	H(812)	8.4505	-8.7853	-2.9147
H(375)	-1.1117	-12.0472	5.5448	H(813)	9.3634	-10.0185	-3.7937
H(376)	1.137	-12.3128	4.5131	C(814)	9.9459	-9.7887	-1.7072
H(377)	1.8355	-9.6561	5.9411	H(815)	10.0472	-8.9482	-0.9646
H(378)	2.8892	-10.5682	4.8571	C(816)	8.9025	-10.7721	-1.184
H(379)	0.5484	-13.3889	6.8625	H(817)	9.139	-11.1183	-0.176
H(380)	-0.5311	-12.5169	7.954	H(818)	7.9038	-10.283	-1.1469
H(381)	1.8499	-12.2659	8.7089	H(819)	8.8137	-11.6499	-1.8293
H(382)	1.1814	-10.6956	8.2323	C(820)	11.3614	4.2133	-0.2848
H(383)	2.9802	-12.4726	6.4703	O(821)	12.5893	4.0652	-0.305
H(384)	3.4569	-10.9578	7.2612	N(822)	10.5729	3.3896	0.4391
H(385)	-0.6094	-10.5674	6.3699	H(823)	10.941	2.6737	1.0791
O(386)	-0.8373	-11.1034	3.1092	H(824)	9.594	3.6187	0.6614
H(387)	-0.9772	-10.7591	2.2279	C(825)	12.0023	3.8976	-3.7406
C(388)	-2.2013	8.4469	1.1554	O(826)	12.0024	4.042	-4.9527
O(389)	-2.4825	8.5388	-0.2136	N(827)	13.1234	4.2689	-3.0293
C(390)	-3.8781	8.6603	-0.4701	H(828)	13.9026	4.6513	-3.5019
C(391)	-4.5503	9.1147	0.8497	H(829)	13.1743	4.1921	-2.002
C(392)	-3.519	8.7236	1.9505	C(830)	11.8443	0.6168	-3.1823
H(393)	-1.3905	9.1941	1.3526	O(831)	13.0442	0.4772	-3.4345
H(394)	-3.9538	9.3228	-1.3463	N(832)	11.3696	0.295	-1.9501
H(395)	-5.5451	8.647	0.9926	H(833)	11.9968	-0.0956	-1.2695
H(396)	-3.8514	7.861	2.5519	H(834)	10.3686	0.117	-1.7703
O(397)	-4.7171	10.4821	0.8925	C(835)	11.739	-1.005	-6.3038
O(398)	-3.3477	9.7931	2.7894	O(836)	11.4284	-1.2913	-7.4486
O(399)	-4.3726	7.4204	-0.8774	N(837)	12.9637	-0.4151	-6.074
H(400)	-4.3883	6.7602	-0.1151	H(838)	13.5512	-0.1875	-6.8374
C(401)	-1.4504	4.8652	1.6954	H(839)	13.247	-0.0818	-5.1412
C(402)	-2.3955	5.9106	1.4402	C(840)	12.0027	-3.9248	-4.5616
C(403)	-4.1681	4.4477	1.4063	O(841)	13.1176	-4.2368	-4.9972
C(404)	-1.911	3.5262	1.8004	N(842)	11.8218	-3.7515	-3.232
C(405)	-0.3216	6.7368	1.6065	H(843)	12.5728	-3.9367	-2.5984
H(406)	0.4778	7.4723	1.5822	H(844)	10.8919	-3.5674	-2.8041
N(407)	-0.1774	5.4255	1.7917	C(845)	11.3033	-6.6407	-6.7422
N(408)	-3.7305	5.7306	1.2764	O(846)	10.8167	-7.3599	-7.5993
N(409)	-5.4884	4.2142	1.3265	N(847)	12.5365	-6.0692	-7.0047
H(410)	-5.8821	3.2499	1.2907	H(848)	12.9258	-6.151	-7.9116
H(411)	-6.1558	5.008	1.2991	H(849)	12.9577	-5.3694	-6.3759
N(412)	-3.3067	3.3598	1.6478	C(850)	10.6967	-7.0649	-2.5289
H(413)	-3.7081	2.3922	1.7035	O(851)	11.8125	-7.0433	-1.9893
O(414)	-1.247	2.5132	2.0157	N(852)	9.7604	-6.1542	-2.2217
N(415)	-1.6811	7.0941	1.4204	H(853)	9.9497	-5.3738	-1.5735
B(416)	-3.8094	11.0245	1.997	C(854)	11.2848	-10.4899	-1.8604
C(417)	-5.4594	13.0016	2.1858	O(855)	11.4419	-11.6718	-2.1337
C(418)	-4.6038	12.0457	3.0197	N(856)	12.4122	-9.7247	-1.626
C(419)	-5.4711	11.2255	3.9712	H(857)	13.3058	-10.1202	-1.7831
C(420)	-6.3511	12.1191	4.8652	H(858)	12.363	-8.6897	-1.5856
C(421)	-7.1972	13.0679	4.0032	H(859)	10.9018	6.3464	1.2977
C(422)	-6.3009	13.9223	3.0941	C(860)	11.3273	7.979	-0.052
H(423)	-4.8372	10.5813	4.6074	O(861)	11.2294	8.4833	-1.1528
H(424)	-3.829	12.6045	3.5762	N(862)	12.4851	8.268	0.6769
H(425)	-6.133	12.4191	1.5252	H(863)	13.0954	8.9581	0.3047
H(426)	-4.8132	13.5979	1.5198	H(864)	12.4933	8.2119	1.6949
H(427)	-5.7295	12.6883	5.5693	C(865)	9.6619	8.9636	2.1485
H(428)	-7.0268	11.4704	5.4612	H(866)	10.1733	9.6939	1.4726
H(429)	-7.8318	13.7041	4.6356	C(867)	8.4358	9.6366	2.7669
H(430)	-7.8849	12.4491	3.3856	H(868)	7.8184	8.9237	3.3507
H(431)	-5.6334	14.5513	3.703	H(869)	8.7051	10.4524	3.4376
H(432)	-6.9111	14.6048	2.485	H(870)	7.7707	10.0448	1.991
H(433)	-6.1209	10.5451	3.3786	C(871)	10.6445	8.5854	3.2457
O(434)	-2.6671	11.7572	1.4079	O(872)	11.8263	8.954	3.2155
H(435)	-2.3076	11.2686	0.6679	N(873)	10.225	7.8281	4.2856
C(436)	6.6382	0.8716	2.0112	H(874)	10.8632	7.5608	5.0024
O(437)	6.9137	1.2152	0.682	H(875)	9.253	7.475	4.3795
C(438)	6.9836	2.6303	0.4886	H(876)	8.778	-6.235	-2.5267
